# Supplementary material for: Synthesis and Investigation of the Analgesic Potential of Enantiomerically Pure Schiff Bases: A Mechanistic Approach
Source: MDPI journal article supplement (doi:10.3390/molecules27165206), 2022-08-15
Supplement: s1 [file s1]

Supplementary Materials

# Synthesis and Investigation of the Analgesic Potential of Enantiomerically Pure Schiff Bases: A Mechanistic Approach

Hamid Hussain Afridi <sup>1,2</sup>, Muhammad Shoaib <sup>1</sup>, Fakhria A. Al-Joufi <sup>3</sup>, Syed Wadood Ali Shah <sup>1</sup>, Haya Hussain <sup>2</sup>, Abid Ullah <sup>2</sup>, Mohammad Zahoor <sup>4,\*</sup> and Ehsan Ullah Mughal <sup>5</sup>

- <sup>1</sup> Department of Pharmacy, University of Malakand Dir (Lower) at Chakdara, Chakdara 18800, Pakistan
  - <sup>2</sup> Department of Pharmacy, Shaheed Benazir Bhutto University Sheringal Dir (Upper), Dir 18000, Pakistan
  - <sup>3</sup> Department of Pharmacology, College of Pharmacy, Jouf University, Aljoud 72341, Saudi Arabia
  - <sup>4</sup> Department of Chemistry, University of Malakand Dir (Lower) at Chakdara, Chakdara 18800, Pakistan
  - <sup>5</sup> Department of Chemistry, University of Gujrat, Gujrat 50700, Pakistan
- \* Correspondence: zahoor@uom.edu.pk

S-Schiff Bases

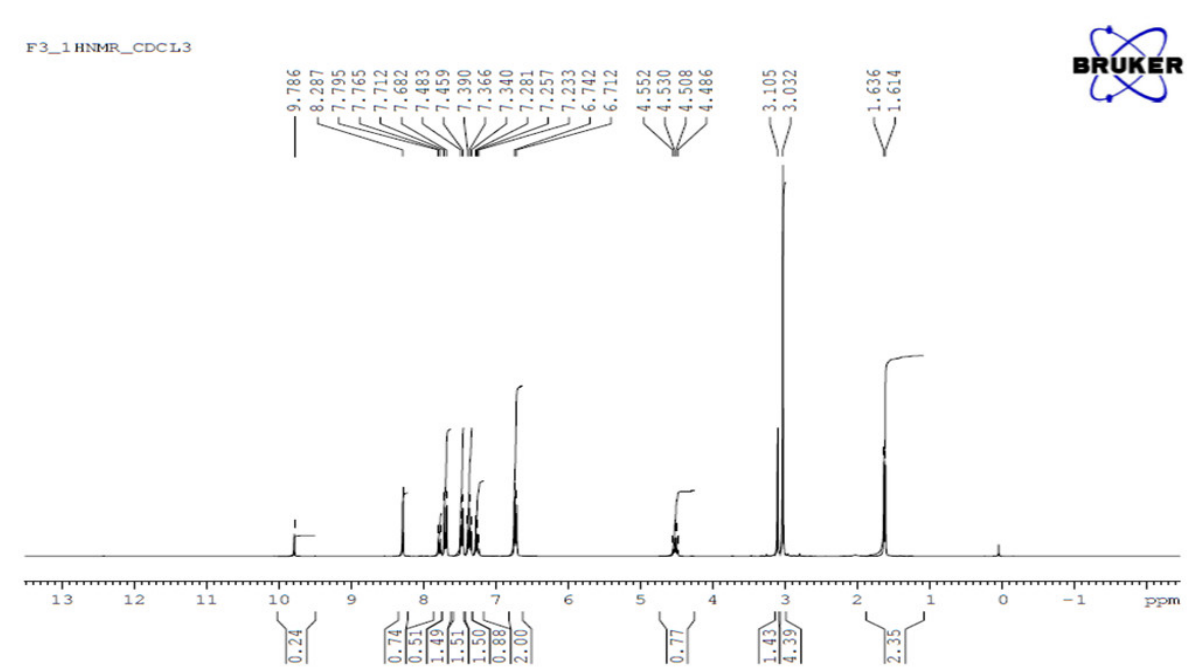

**Figure S1.** HNMR spectra of (S,E)-N,N-dimethyl-4-(((1-phenylethyl)imino)methyl)aniline (H1)

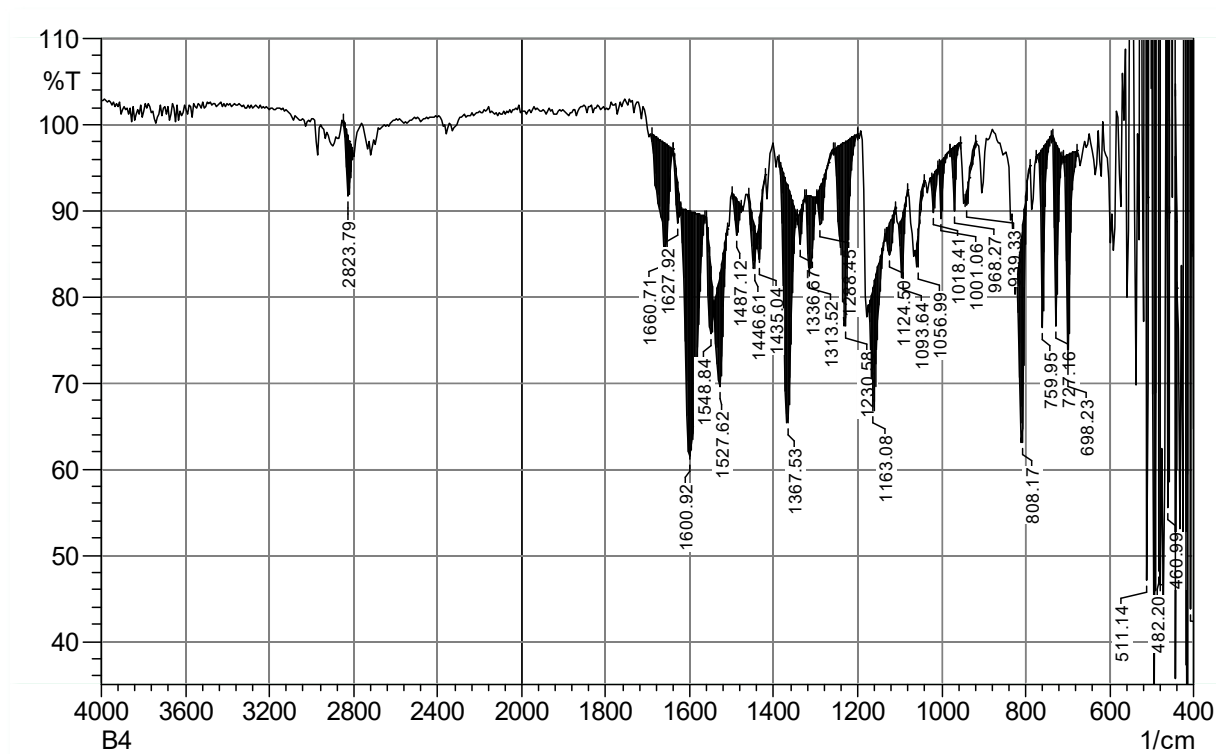

**Figure S2.** IR spectra of (S,E)-N,N-dimethyl-4-(((1-phenylethyl)imino)methyl)aniline (**H1**)

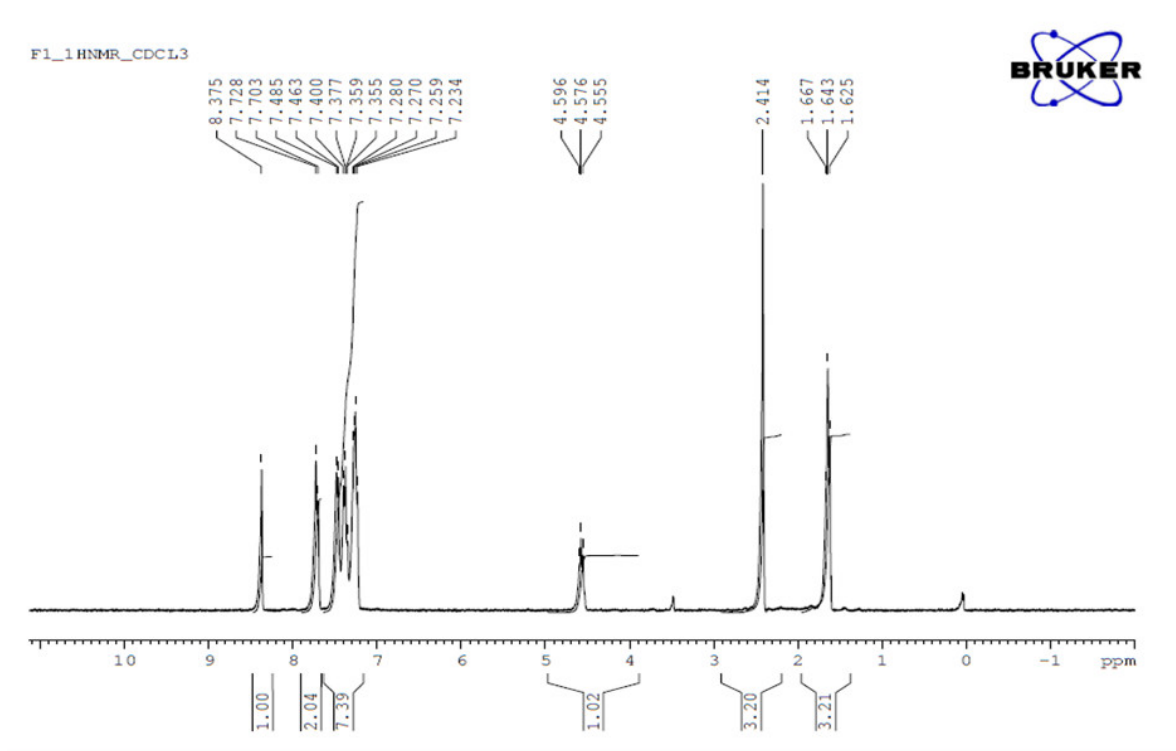

**Figure S3.** HNMR spectra of (S,E)-N-(4-methylbenzylidene)-1-phenylethanamine (**H2**)

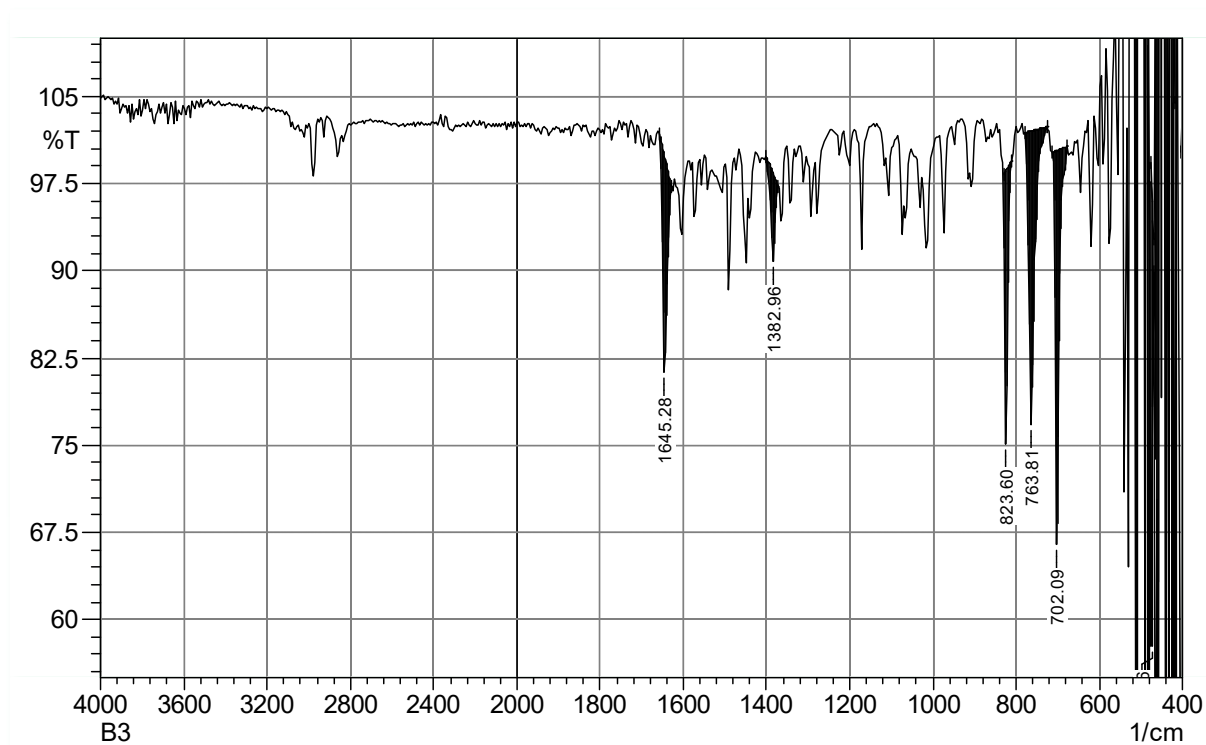

**Figure S4.** IR spectra of (S,E)-N-(4-methylbenzylidene)-1-phenylethanamine (**H2**)

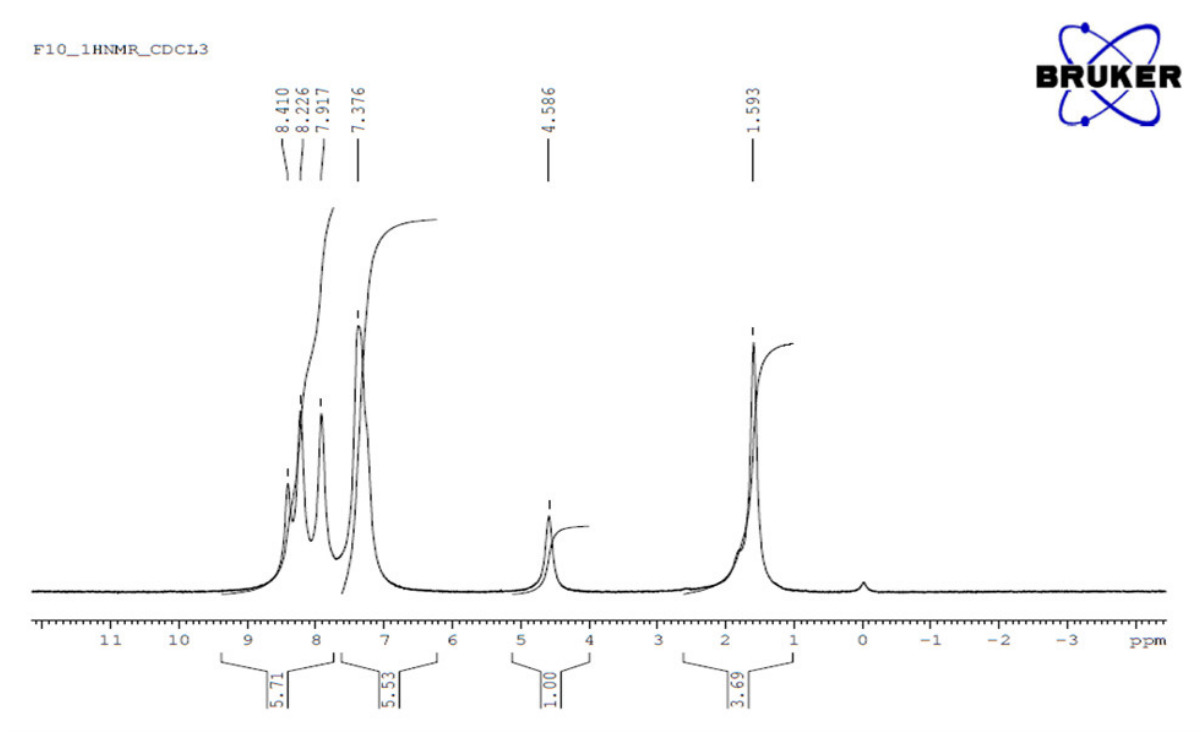

**Figure S5.** HNMR spectra of *(S,E)*-*N*-(4-nitrobenzylidene)-1-phenylethanamine (**H3**)

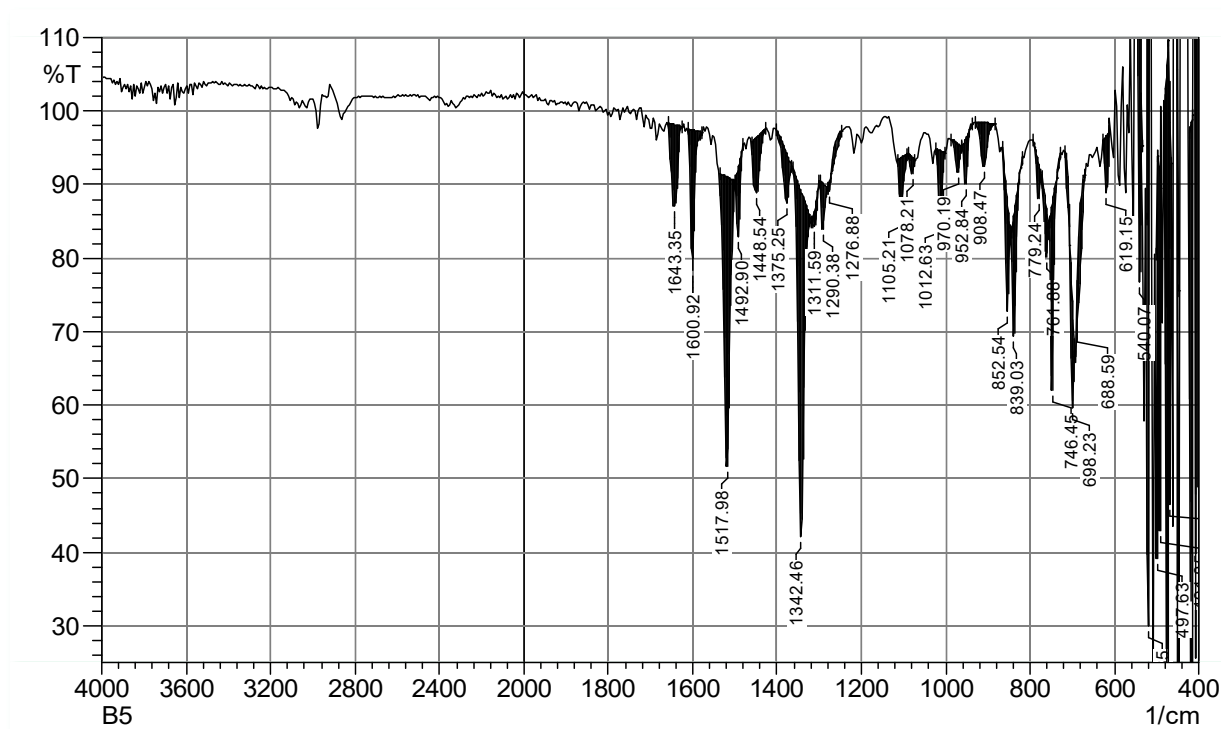

**Figure S6.** IR spectra of (S,E)-N-(4-nitrobenzylidene)-1-phenylethanamine (**H3**)

## R- Schiff Bases

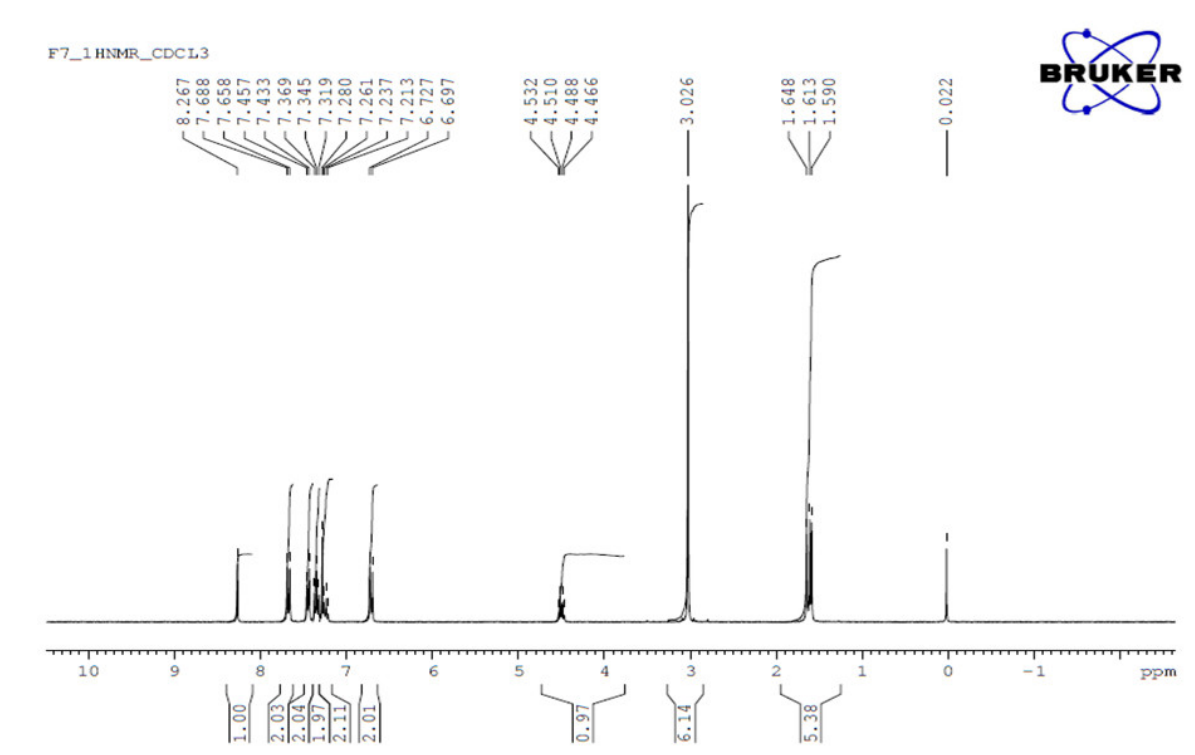

**Figure S7.**  $^1\text{H}$ NMR spectra of *(R,E)*-*N,N*-dimethyl-4-(((1-phenylethyl)imino)methyl)aniline (**H4**)

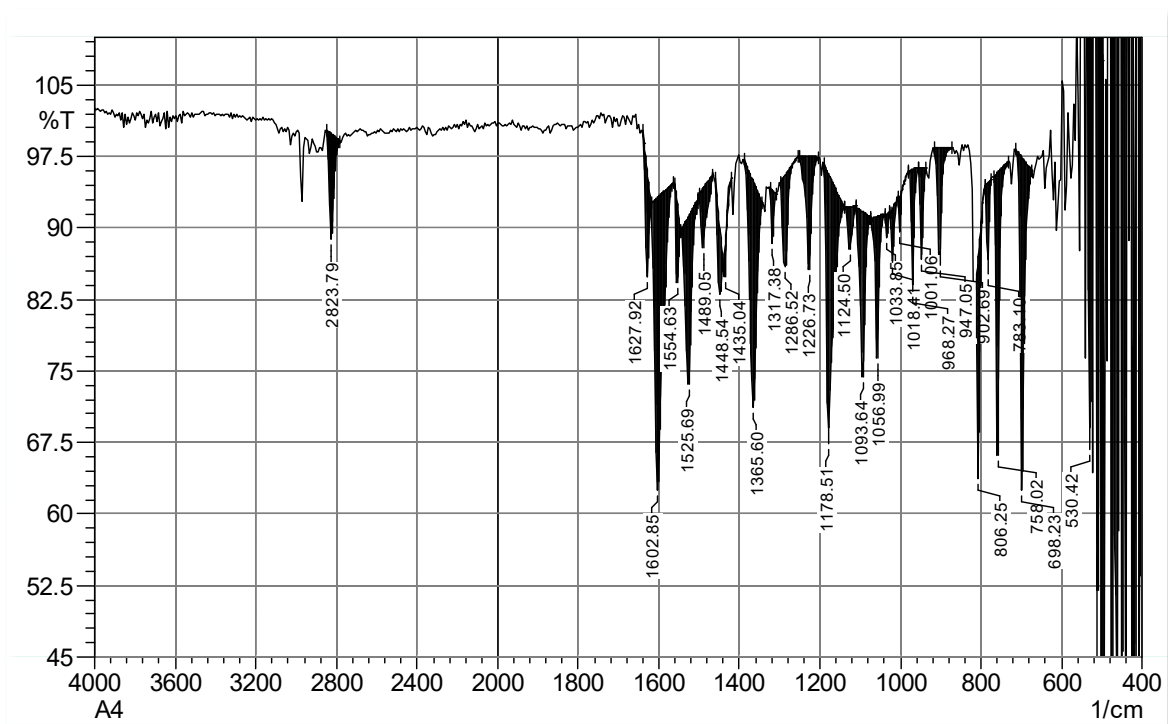

**Figure S8.** IR spectra of (R,E)-N,N-dimethyl-4-(((1-phenylethyl)imino)methyl)aniline (**H4**)

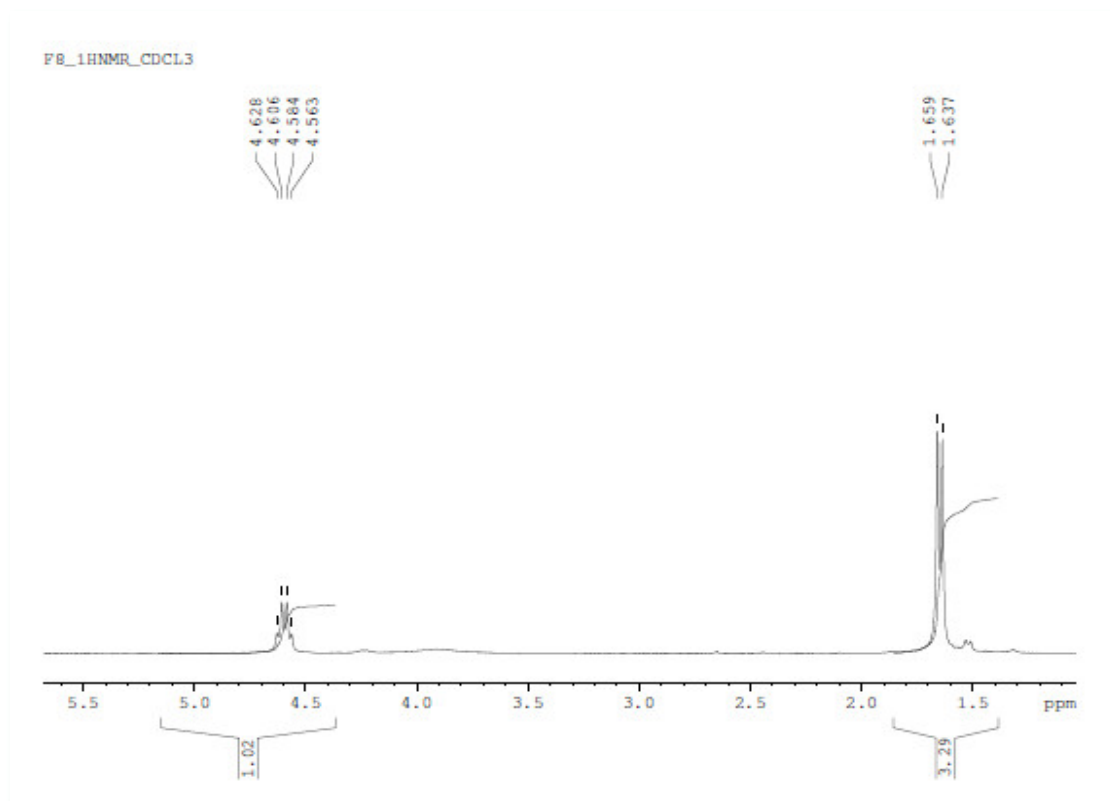

**Figure S9.** <sup>1</sup>H NMR spectra of (*R,E*)-*N*-(4-methylbenzylidene)-1-phenylethanamine (**H5**)

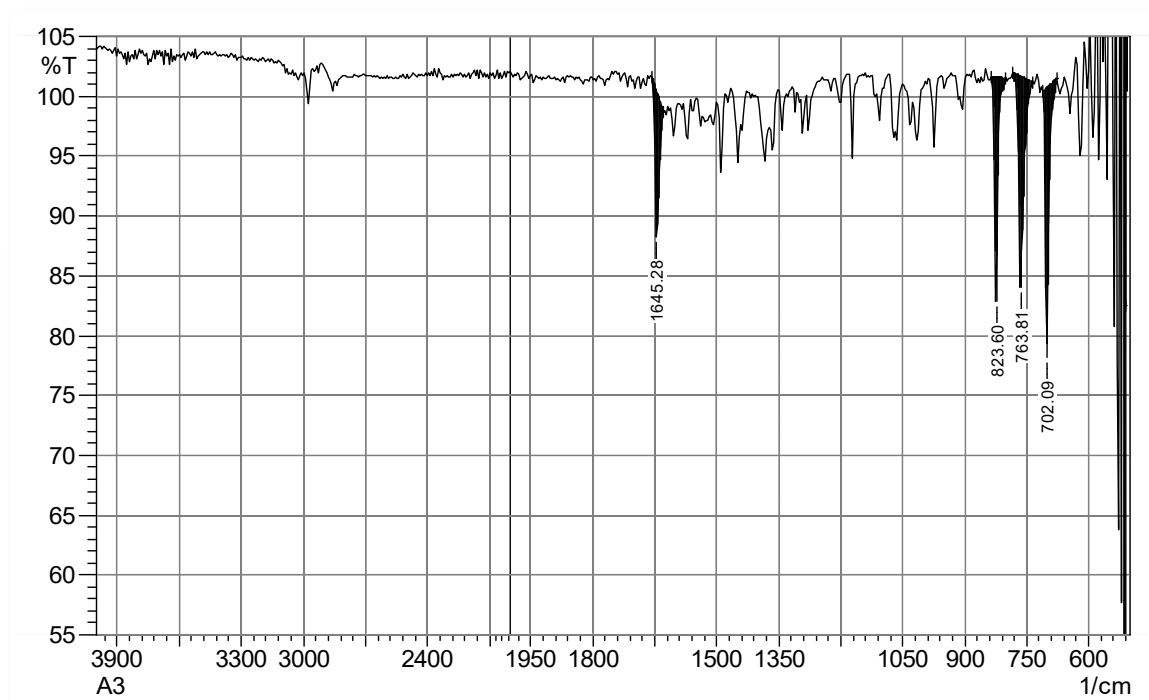

**Figure S10.** IR spectra of *(R,E)*-*N*-(4-methylbenzylidene)-1-phenylethanamine (**H5**)

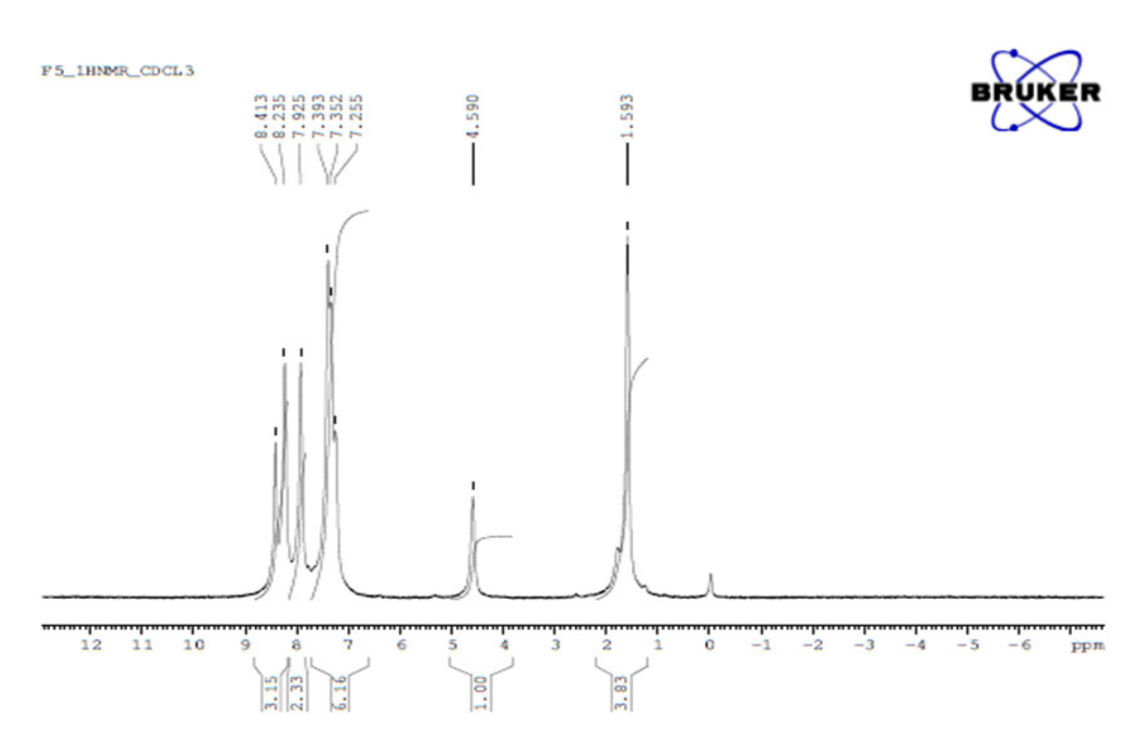

**Figure S11.** <sup>1</sup>H NMR spectra of (*R,E*)-*N*-(4-nitrobenzylidene)-1-phenylethanamine (**H6**)

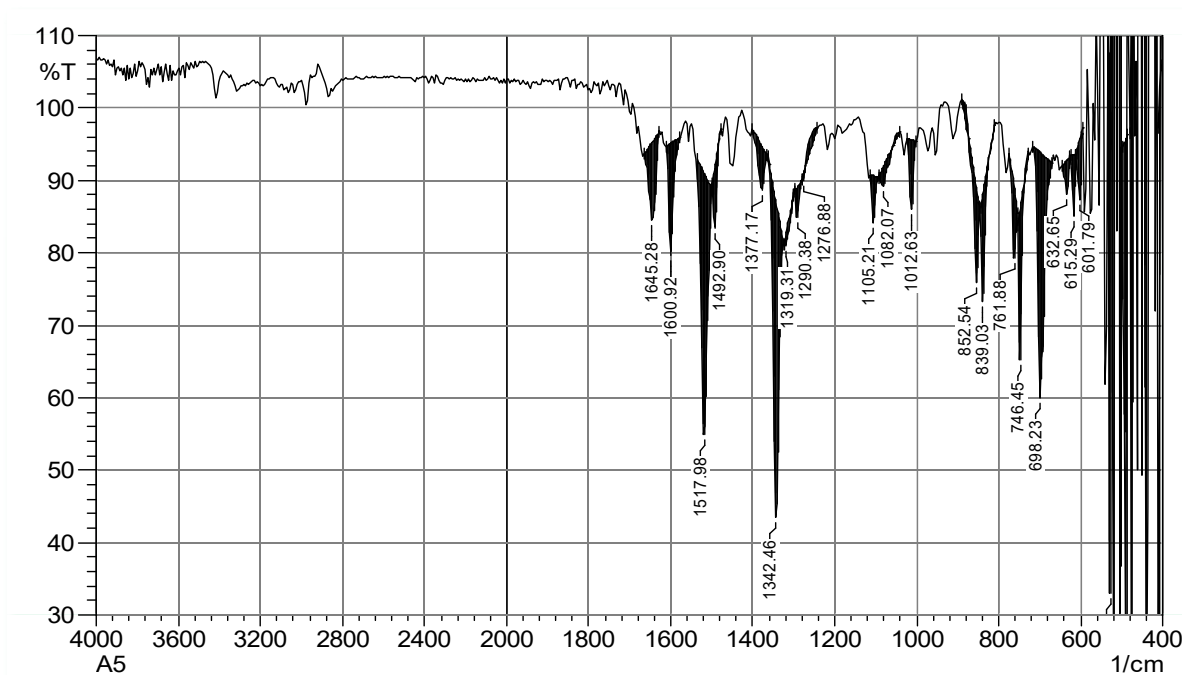

**Figure S12.** IR spectra of *(R,E)*-N-(4-nitrobenzylidene)-1-phenylethanamine (**H6**)
